# Supplementary material for: HO-3867 Induces Apoptosis via the JNK Signaling Pathway in Human Osteosarcoma Cells
Source: MDPI journal article supplement (doi:10.3390/pharmaceutics14061257), 2022-06-13
Supplement: s1 [file s1]

## Supplementary Figure S1

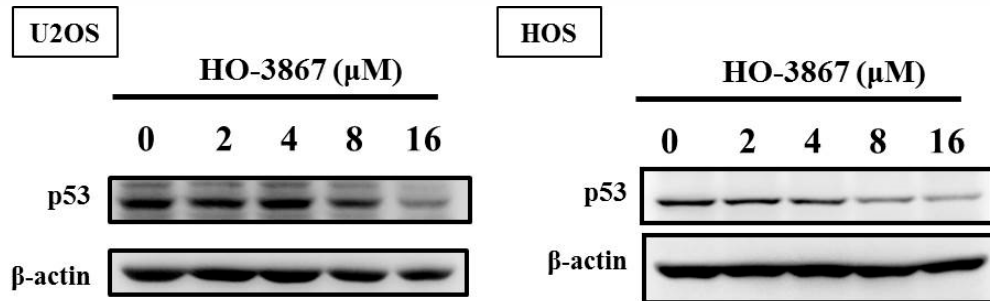

**Supplementary Figure S1. Analysis of p53 expression in HO-3867 treated U2OS and HOS cells.** After experimental concentration range of HO-3867 treatment for 24 h, Western blot analysis was performed to measure expressions of p53 in U2OS and HOS cells.
